# Supplementary material for: Neurodevelopmental Syndrome with Intellectual Disability, Speech Impairment, and Quadrupedia Is Associated with Glutamate Receptor Delta 2 Gene Defect
Source: MDPI journal article supplement (doi:10.3390/cells11030400), 2022-01-25
Supplement: s1 [file s1]

## Supplemental Tables

**Table S1.** Regions of homozygosity found by HomozygosityMapper [1] in patients (IV-1, IV-2, IV-3).

| Score | chr | From (bp)   | To (bp)     | From SNP   | To SNP     | Length, bp |
|-------|-----|-------------|-------------|------------|------------|------------|
| 3000  | 4   | 78,505,578  | 94,129,968  | rs355687   | rs994011   | 15,624,390 |
| 3000  | 7   | 103,397,404 | 113,529,740 | rs694894   | rs8180864  | 10,132,336 |
| 3000  | 14  | 56,348,506  | 66,419,099  | rs28496257 | rs12880549 | 10,070,593 |
| 3000  | 3   | 10,627,561  | 13,516,646  | rs12490065 | rs2597506  | 2,889,085  |
| 2452  | 14  | 66,448,348  | 69,163,110  | rs1147455  | rs8013046  | 2,714,762  |
| 3000  | 11  | 132,719,646 | 134,944,770 | rs4575282  | rs11224232 | 2,225,124  |
| 2687  | 4   | 94,142,499  | 96,324,373  | rs1875705  | rs12510417 | 2,181,874  |

**Table S2.** List of candidate genes detected in the genome of Brazilian family patient (IV-1).

| Gene                                                                         | Coordinates                | ID           | Variant**                  | Genotype | Exon | Amino acid substitution        | Minor Allele Frequency in population [2] |            | SIFT               | POLIPHEN                  | CADD (PHRED score)*** |
|------------------------------------------------------------------------------|----------------------------|--------------|----------------------------|----------|------|--------------------------------|------------------------------------------|------------|--------------------|---------------------------|-----------------------|
|                                                                              |                            |              |                            |          |      |                                | Global                                   | Max MAF    |                    |                           |                       |
| A. Variants in potential genes****                                           |                            |              |                            |          |      |                                |                                          |            |                    |                           |                       |
| VLDLR                                                                        | chr9: 2,639,898            | rs140526335  | A>G                        | Homoz.   | 3    | N81S                           | 0.0024                                   | 0.0196 ITU | Tolerated (0.142)  | Benign (0.083)            | 26.6                  |
| B. Variants in region of maximum homozygosity                                |                            |              |                            |          |      |                                |                                          |            |                    |                           |                       |
| COQ2                                                                         | chr4:84,206,004            | rs112033303  | T>A                        | Homoz.   | 1    | R22*                           | 0.01                                     | 0.0561 IBS |                    |                           | 25.8                  |
| CDS1                                                                         | chr4:85,525,421            | rs118099717  | G>C                        | Homoz.   | 2    | G48A                           | 0.0004                                   | 0.0097 CHB | Tolerated (0.844)  | Benign (0.003)            | 18.43                 |
| GRID2                                                                        | chr4:94,112,040-94,148,272 | -            | 36.2 kb deletion, in frame | Homoz.   | 5-7  | Deletion of 130 aa (V246-K375) | -                                        | -          | -                  | -                         | -                     |
| C. Variants in small regions of homozygosity with potential minor effect**** |                            |              |                            |          |      |                                |                                          |            |                    |                           |                       |
| PUM3                                                                         | chr9:2,831,011             | rs1241779268 | T>C                        | Homoz    | 7    | S210G                          | 0.0002                                   | 0.0052 ACB | Tolerated (0.05)   | Benign (0.412)            | 23.5                  |
| ARNT2                                                                        | chr15:80,866,557           | rs750637347  | C>G                        | Homoz    | 13   | S462C                          | 0.0002                                   | 0.0047 IBS | Deleterious (0.01) | Possibly damaging (0.894) | 23.6                  |
| ODF3L2                                                                       | chr19:467,696              | rs756671415  | C>T                        | Homoz    | 3    | R101H                          | 0.0004                                   | 0.0118 PEL | Deleterious (0)    | Possibly damaging (0.98)  | 26.9                  |

ITU — Indian Telugu from the UK; IBS — Iberian population from Spain; CHB — Han Chinese in Beijing, China; ABS — African Caribbean in Barbados; PEL — Peruvians from Lima, Peru. Homoz. – homozygous state.

\*Stop codon

\*\*Variants are reported in the forward orientation.

\*\*\*The CADD PHRED score more than 10 indicates the 10% most deleterious substitutions from the human genome; more than 20 indicates the 1% most deleterious substitutions from the human genome [3].

\*\*\*\* The inheritance of these variants in the family's relatives did not correspond to the disease status. Genotyping analysis by PCR and Sanger Sequencing demonstrated:

- rs140526335 variant in *VLDLR* gene is in homozygous state of minor allele in two patients (IV-1 and IV-3), in heterozygous state in one patient (IV-2), mother (III-2) and healthy step-brother (IV-5);

- rs1241779268 variant in *PUM3* gene is in homozygous state of minor allele in two patients (IV-1 and IV-2), in heterozygous state in one patient (IV-3), mother (III-2) and healthy step-brother (IV-5);
- rs750637347 variant in *ARNT2* gene is in homozygous state of minor allele in two patients (IV-1 and IV-2), in heterozygous state in mother (III-2) and healthy step-brother (IV-5), in homozygous state of wild allele in one patient (IV-3);
- rs756671415 variant in *ODF3L2* gene is in homozygous state of minor allele in one patient (IV-1), in heterozygous state in one patient (IV-3), mother (III-2) and healthy step-brother (IV-5), in homozygous state of wild allele in one patient (IV-2);

**Table S3.** Oligonucleotide sequences used to validate candidate variants.

| Oligonucleotide name      | Sequence (from 5'end)  |
|---------------------------|------------------------|
| VLDLR_For                 | AGTGCCCATTCGACTCAGCTT  |
| VLDLR_Rev                 | TGAACCATCTTCGCAGTCAG   |
| COQ2_For                  | GACGAGCTCGGATTGACG     |
| COQ2_Rev                  | GCCTTTTGCCAATAGAAATCC  |
| CDS1_For                  | GAATGTATTGCCAGCCTGT    |
| CDS1_Rev                  | AGGGGTTCTATCTGAGGATGG  |
| GRID2_flanked_region_For  | GACCTACGCTATTTCTAGCTTT |
| GRID2_deletion_region_Rev | GCAATTATGCCAGATCATTCTC |
| GRID2_flanked_region_Rev  | TGTAGTCCCAGCTACTCAGGA  |
| PUM3_For                  | TGTTTAGGTTGTCTCTCCAGA  |
| PUM3_Rev                  | ATGCCAACAAATCAGAAGGTG  |
| ARNT2_For                 | CCTCTGAGGTATGGGAAAAGTC |
| ARNT2_Rev                 | TGTAGGTCTGCTCTTTCCATTG |
| ODF3L2_For                | CTGGTGGGAGTGTCTCGG     |
| ODF3L2_Rev                | CTCCTCCGTGTCCCTTGG     |

**Table S4.** Evolutionary analysis of primate protein-coding sequences of *GRID2* gene using one, free and two branch-specific models [4,5].

| Model |               | NP | InL                             | $\omega^{M0}$               |                              |                             | 2 $\Delta$ InL              | P-value |                       |
|-------|---------------|----|---------------------------------|-----------------------------|------------------------------|-----------------------------|-----------------------------|---------|-----------------------|
| M0    |               | 50 | -7471.5742                      | 0.02747                     |                              |                             |                             |         |                       |
| M1    |               | 94 | -7445.4004                      |                             |                              |                             | 52.35                       | 0.182   |                       |
| Model | Branch number | NP | InL                             | $\omega^{M1}$               | $\omega^{M2}$ (backgr)       | $\omega^{M2}$ (foregr)      | 2 $\Delta$ InL              | P-value | FDR-corrected p-value |
| M2    | 45            | 51 | Min: -7471.57;<br>Max: -7466.60 | Min: 0.0001;<br>Max: 0.5641 | Min: 0.02573;<br>Max: 0.0315 | Min: 0.0001;<br>Max: 115.97 | Min: -52.35;<br>Max: -42.40 | >0.15   | >0.23                 |

**Table S5.** Evolutionary analysis of primate protein-coding sequences of *GRID2* gene using branch-site-specific model A [6].

| #  | Branch                               | MA0 |            | MA1 |            | 2 $\Delta$ InL | P-value   | FDR-corrected p-value | BEB                                       |
|----|--------------------------------------|-----|------------|-----|------------|----------------|-----------|-----------------------|-------------------------------------------|
|    |                                      | NP  | InL        | NP  | InL        |                |           |                       |                                           |
| 1  | <i>Homo sapiens</i>                  | 52  | -7447.2991 | 53  | -7447.2991 | 0.000006       | 0.4990228 | 0.5                   |                                           |
| 2  | <i>Homo sapiens neanderthalensis</i> | 52  | -7447.2991 | 53  | -7447.2991 | 0.000004       | 0.4992021 | 0.5                   |                                           |
| 3  | <i>Homo sapiens ssp 'Denisova'</i>   | 52  | -7445.3979 | 53  | -7445.3979 | 0.000004       | 0.4992021 | 0.5                   | 330 T 0.779                               |
| 4  | <i>Homo</i>                          | 52  | -7447.2991 | 53  | -7447.2991 | 0.000002       | 0.4994358 | 0.5                   |                                           |
| 5  | <i>Pan troglodytes</i>               | 52  | -7447.2991 | 53  | -7447.2991 | 0.000004       | 0.4992021 | 0.5                   |                                           |
| 6  | <i>Pan paniscus</i>                  | 52  | -7447.2991 | 53  | -7447.2991 | 0.000004       | 0.4992021 | 0.5                   |                                           |
| 7  | <i>Pan</i>                           | 52  | -7447.2991 | 53  | -7447.2991 | 0.000004       | 0.4992021 | 0.5                   |                                           |
| 8  | <i>Hominini</i>                      | 52  | -7447.2991 | 53  | -7447.2991 | 0.000002       | 0.4994358 | 0.5                   |                                           |
| 9  | <i>Gorilla gorilla</i>               | 52  | -7447.2991 | 53  | -7447.2991 | 0              | 0.5000000 | 0.5                   |                                           |
| 10 | <i>Homininae</i>                     | 52  | -7447.2991 | 53  | -7447.2991 | 0.000002       | 0.4994358 | 0.5                   |                                           |
| 11 | <i>Pongo abelii</i>                  | 52  | -7447.2991 | 53  | -7447.2991 | 0              | 0.5000000 | 0.5                   |                                           |
| 12 | <i>Hominidae</i>                     | 52  | -7447.2991 | 53  | -7447.2991 | 0.000026       | 0.4979658 | 0.5                   |                                           |
| 13 | <i>Nomascus leucogenys</i>           | 52  | -7447.2991 | 53  | -7447.0931 | 0.411976       | 0.2604841 | 0.5                   | 248 E 0.563                               |
| 14 | <i>Hominoidea</i>                    | 52  | -7446.6573 | 53  | -7446.6573 | 0.000006       | 0.4990228 | 0.5                   | 153 H 0.654                               |
| 15 | <i>Papio anubis</i>                  | 52  | -7447.2991 | 53  | -7447.2991 | 0              | 0.5000000 | 0.5                   |                                           |
| 16 | <i>Theropithecus gelada</i>          | 52  | -7445.8937 | 53  | -7445.8937 | 0              | 0.5000000 | 0.5                   | 244 T 0.746                               |
| 17 | <i>Papio&amp;Theropithecus</i>       | 52  | -7447.2991 | 53  | -7447.2991 | 0              | 0.5000000 | 0.5                   |                                           |
| 18 | <i>Macaca fascicularis</i>           | 52  | -7447.2991 | 53  | -7447.2991 | 0.000004       | 0.4992021 | 0.5                   |                                           |
| 19 | <i>Macaca nemestrina</i>             | 52  | -7446.5422 | 53  | -7446.2213 | 0.641836       | 0.2115234 | 0.5                   | 19 D 0.508                                |
| 20 | <i>Macaca</i>                        | 52  | -7447.2991 | 53  | -7447.2991 | 0.000002       | 0.4994358 | 0.5                   |                                           |
| 21 | <i>Papionini</i>                     | 52  | -7447.2991 | 53  | -7447.2992 | 0.000130       | 0.4954515 | 0.5                   |                                           |
| 22 | <i>Chlorocebus sabaeus</i>           | 52  | -7446.7419 | 53  | -7446.7419 | 0              | 0.5000000 | 0.5                   | 830 S 0.636                               |
| 23 | <i>Cercopithecinae</i>               | 52  | -7447.2991 | 53  | -7447.2991 | 0              | 0.5000000 | 0.5                   |                                           |
| 24 | <i>Rhinopithecus bieti</i>           | 52  | -7446.5335 | 53  | -7446.5335 | 0              | 0.5000000 | 0.5                   | 836 C 0.677                               |
| 25 | <i>Colobus angolensis</i>            | 52  | -7444.0159 | 53  | -7443.8565 | 0.318818       | 0.2861594 | 0.5                   | 210 T 0.778<br>764 T 0.778                |
| 26 | <i>Ptilocolobus tephrosceles</i>     | 52  | -7447.2991 | 53  | -7447.2991 | 0              | 0.5000000 | 0.5                   |                                           |
| 27 | <i>African Colobinae</i>             | 52  | -7447.2991 | 53  | -7447.2991 | 0.000084       | 0.4963437 | 0.5                   |                                           |
| 28 | <i>Colobinae</i>                     | 52  | -7447.2991 | 53  | -7447.2991 | 0.000004       | 0.4992021 | 0.5                   |                                           |
| 29 | <i>Cercopithecidae</i>               | 52  | -7447.2991 | 53  | -7447.2991 | 0.000004       | 0.4992021 | 0.5                   |                                           |
| 30 | <i>Catarrhini</i>                    | 52  | -7447.2991 | 53  | -7447.2991 | 0.000002       | 0.4994358 | 0.5                   |                                           |
| 31 | <i>Callithrix jacchus</i>            | 52  | -7446.509  | 53  | -7446.5090 | 0              | 0.5000000 | 0.5                   | 630 T 0.546<br>842 I 0.542                |
| 32 | <i>Aotus nancymae</i>                | 52  | -7447.2991 | 53  | -7447.2991 | 0              | 0.5000000 | 0.5                   |                                           |
| 33 | <i>Callithrix&amp;Aotus</i>          | 52  | -7447.2991 | 53  | -7447.2991 | 0.000006       | 0.4990228 | 0.5                   |                                           |
| 34 | <i>Saimiri boliviensis</i>           | 52  | -7447.2991 | 53  | -7447.2991 | 0              | 0.5000000 | 0.5                   |                                           |
| 35 | <i>Cebus capucinus</i>               | 52  | -7444.042  | 53  | -7444.0420 | 0.000002       | 0.4994358 | 0.5                   | 233 V 0.657<br>490 V 0.652<br>713 N 0.656 |
| 36 | <i>Saimiri&amp;Cebus</i>             | 52  | -7447.2991 | 53  | -7447.2991 | 0.000002       | 0.4994358 | 0.5                   |                                           |
| 37 | <i>Platyrrhini</i>                   | 52  | -7447.2991 | 53  | -7447.2991 | 0.000004       | 0.4992021 | 0.5                   |                                           |
| 38 | <i>Simiiformes</i>                   | 52  | -7447.2991 | 53  | -7447.2991 | 0.000004       | 0.4992021 | 0.5                   |                                           |
| 39 | <i>Microcebus murinus</i>            | 52  | -7447.2991 | 53  | -7447.2992 | 0.000168       | 0.4948293 | 0.5                   |                                           |

|    |                              |    |            |    |            |          |           |     |             |
|----|------------------------------|----|------------|----|------------|----------|-----------|-----|-------------|
| 40 | <i>Propithecus coquereli</i> | 52 | -7447.2991 | 53 | -7447.2991 | 0        | 0.5000000 | 0.5 |             |
| 41 | <i>Lemuriformes</i>          | 52 | -7447.2991 | 53 | -7447.2990 | 0.000092 | 0.4961735 | 0.5 |             |
| 43 | <i>Otolemur garnettii</i>    | 52 | -7447.2992 | 53 | -7447.2991 | 0.000150 | 0.4951141 | 0.5 |             |
| 44 | <i>Strepsirrhini</i>         | 52 | -7447.2683 | 53 | -7447.2991 | 0.061648 | 0.4019550 | 0.5 | 676 E 0.508 |
| 45 | <i>Primates</i>              | 52 | -7446.2892 | 53 | -7446.2892 | 0.000004 | 0.4992021 | 0.5 |             |

**Table S6.** Gibbs free energy values for mRNA fragments of the *GRID2* gene and their change depending on nucleotide variants, calculated by mFold [7].

| Chromosome 4 position                   | 93225840 | 94031933 | 94031993 | 94137900 | 94145790 | 94159584 | 94159638 | 94316763  | 94344032   | 94344060 | 94376878 | 94411797 | 94436426 | 94436547 | 94690593 |
|-----------------------------------------|----------|----------|----------|----------|----------|----------|----------|-----------|------------|----------|----------|----------|----------|----------|----------|
| rs                                      |          |          |          |          |          |          |          | rs1385405 | rs72668716 |          |          |          |          |          |          |
| Nucleotide position in CDS              | 32       | 564      | 624      | 801      | 989      | 1188     | 1242     | 1251      | 1458       | 1488     | 1611     | 1866     | 2058     | 2178     | 2592     |
| The species which have ancestral allele | Hs       | Pt       | Pt       | Hs       | Hs, Pt   | Hs       | Pt       | Pt        | Pt         | Pt       | Pt       | Pt       | Pt       | Pt       | Hs       |
| dG (kcal/mol)                           |          |          |          |          |          |          |          |           |            |          |          |          |          |          |          |
| <b>301 nt</b>                           |          |          |          |          |          |          |          |           |            |          |          |          |          |          |          |
| <i>Homo sapiens</i>                     | -84.5    | -68.0    | -75.4    | -79.9    | -87.9    | -89.6    | -92.0    | -91.0     | -79.4      | -79.9    | -87.6    | -76.2    | -77.7    | -86.3    | -84.0    |
| <i>Denisova</i>                         | -84.5    | -68.0    | -75.4    | -79.9    | -87.5    | -89.9    | -92.3    | -91.3     | -79.4      | -79.9    | -87.6    | -76.2    | -77.7    | -86.3    | -84.0    |
| <i>Pan troglodytes</i>                  | -82.9    | -67.9    | -74.8    | -79.5    | -87.9    | -90.3    | -94.3    | -93.3     | -79.2      | -79.1    | -87.9    | -78.3    | -72.0    | -80.8    | -87.6    |
| <b>151 nt</b>                           |          |          |          |          |          |          |          |           |            |          |          |          |          |          |          |
| <i>Homo sapiens</i>                     | -35.8    | -29.6    | -29.7    | -30.5    | -37.4    | -32.6    | -30.5    | -31.3     | -37.9      | -33.0    | -35.5    | -36.1    | -43.8    | -39.0    | -39.4    |
| <i>Denisova</i>                         | -35.8    | -29.6    | -29.7    | -30.5    | -36.6    | -35.1    | -31.5    | -32.5     | -37.9      | -33.0    | -35.5    | -36.1    | -43.8    | -39.0    | -39.4    |
| <i>Pan troglodytes</i>                  | -36.0    | -28.6    | -31.0    | -31.7    | -37.4    | -34.6    | -31.8    | -33.6     | -35.2      | -28.9    | -36.2    | -36.6    | -38.7    | -38.5    | -40.3    |
| <b>75 nt</b>                            |          |          |          |          |          |          |          |           |            |          |          |          |          |          |          |
| <i>Homo sapiens</i>                     | -17.6    | -16.6    | -11.0    | -5.9     | -11.0    | -11.2    | -16.7    | -15.0     | -11.4      | -12.6    | -15.5    | -17.0    | -21.3    | -11.7    | -18.8    |
| <i>Denisova</i>                         | -17.6    | -16.6    | -11.0    | -5.9     | -11.0    | -11.2    | -17.0    | -15.3     | -11.4      | -12.6    | -15.5    | -17.0    | -21.3    | -11.7    | -18.8    |
| <i>Pan troglodytes</i>                  | -17.0    | -15.9    | -9.4     | -7.0     | -11.0    | -11.1    | -18.3    | -16.6     | -10.6      | -9.7     | -16.2    | -18.8    | -15.8    | -11.1    | -17.9    |
| <b>51 nt</b>                            |          |          |          |          |          |          |          |           |            |          |          |          |          |          |          |
| <i>Homo sapiens</i>                     | -9.5     | -7.3     | -3.7     | -2.8     | -2.0     | -4.4     | -9.5     | -10.0     | -7.6       | -7.6     | -8.6     | -9.6     | -12.0    | -7.9     | -6.5     |
| <i>Denisova</i>                         | -9.5     | -7.3     | -3.7     | -2.8     | -2.7     | -4.4     | -9.5     | -10.3     | -7.6       | -7.6     | -8.6     | -9.6     | -12.0    | -7.9     | -6.5     |
| <i>Pan troglodytes</i>                  | -7.3     | -8.1     | -3.7     | -2.9     | -2.0     | -4.3     | -11.1    | -11.6     | -7.9       | -5.1     | -9.3     | -9.6     | -10.2    | -6.7     | -7.3     |
| <b>25 nt</b>                            |          |          |          |          |          |          |          |           |            |          |          |          |          |          |          |
| <i>Homo sapiens</i>                     | -1.1     | -2.3     | 1.7      | -0.6     | -1.0     | 0.1      | -1.3     | 0.3       | -0.7       | -1.2     | -1.9     | -9.6     | -1.5     | -4.9     | -2.6     |
| <i>Denisova</i>                         | -1.1     | -2.3     | 1.7      | -0.6     | -1.0     | 0.1      | -1.3     | -3.4      | -0.7       | -1.2     | -1.9     | -9.6     | -1.5     | -4.9     | -2.6     |
| <i>Pan troglodytes</i>                  | 1.1      | -3.7     | 1.7      | -1.5     | -1.0     | 0.0      | -1.7     | -3.4      | -0.9       | -1.6     | -1.9     | -9.6     | -0.9     | -4.2     | -2.7     |
| ddG (Homo-Pan)                          |          |          |          |          |          |          |          |           |            |          |          |          |          |          |          |
| <b>301 nt</b>                           | -1.6     | -0.1     | -0.6     | -0.4     | 0.0      | 0.7      | 2.3      | 2.3       | -0.2       | -0.8     | 0.3      | 2.1      | -5.7     | -5.5     | 3.6      |
| <b>151 nt</b>                           | 0.2      | -1.0     | 1.3      | 1.2      | 0.0      | 2.0      | 1.3      | 2.3       | -2.7       | -4.1     | 0.7      | 0.5      | -5.1     | -0.5     | 0.9      |
| <b>75 nt</b>                            | -0.6     | -0.7     | -1.6     | 1.1      | 0.0      | -0.1     | 1.6      | 1.6       | -0.8       | -2.9     | 0.7      | 1.8      | -5.5     | -0.6     | -0.9     |
| <b>51 nt</b>                            | -2.2     | 0.8      | 0.0      | 0.1      | 0.0      | -0.1     | 1.6      | 1.6       | 0.3        | -2.5     | 0.7      | 0.0      | -1.8     | -1.2     | 0.8      |
| <b>25 nt</b>                            | -2.2     | 1.4      | 0.0      | 0.9      | 0.0      | 0.1      | 0.4      | 3.7       | 0.2        | 0.4      | 0.0      | 0.0      | -0.6     | -0.7     | 0.1      |
| <b>p-value</b>                          | 0.180    | 0.655    | 0.564    | 0.180    |          | 0.655    | 0.025    | 0.025     | 0.653      | 0.180    | 0.046    | 0.08     | 0.025    | 0.025    | 0.178    |
| ddG (Homo-Den)                          |          |          |          |          |          |          |          |           |            |          |          |          |          |          |          |
| <b>301 nt</b>                           | 0        | 0        | 0        | 0        | -0.4     | 0.3      | 0.3      | 0.3       | 0          | 0        | 0        | 0        | 0        | 0        | 0        |
| <b>151 nt</b>                           | 0        | 0        | 0        | 0        | -0.8     | 2.5      | 1        | 1.2       | 0          | 0        | 0        | 0        | 0        | 0        | 0        |
| <b>75 nt</b>                            | 0        | 0        | 0        | 0        | 0        | 0        | 0.3      | 0.3       | 0          | 0        | 0        | 0        | 0        | 0        | 0        |
| <b>51 nt</b>                            | 0        | 0        | 0        | 0        | 0.7      | 0        | 0        | 0.3       | 0          | 0        | 0        | 0        | 0        | 0        | 0        |
| <b>25 nt</b>                            | 0        | 0        | 0        | 0        | 0        | 0        | 0        | 3.7       | 0          | 0        | 0        | 0        | 0        | 0        | 0        |
| <b>p-value</b>                          |          |          |          |          | 0.564    | 0.157    | 0.083    | 0.025     |            |          |          |          |          |          |          |

Hs - *Homo sapiens*; Pt - *Pan troglodytes*.

**Table S7.** Gibbs free energy values for mRNA fragments of the *GRID2* gene in different species of primates, calculated by mFold [7].

| Nucleotide position in CDS | 18            | 129       | 138 & 141 | 228        | 457        | 528       | 711        | 879      | 1335      | 1593       | 1860      | 2217       | 2445      |
|----------------------------|---------------|-----------|-----------|------------|------------|-----------|------------|----------|-----------|------------|-----------|------------|-----------|
| Branch                     | Homininae     | Homininae | Hominini  | Hominoidea | Hominoidea | Homininae | Hominoidea | Hominini | Homininae | Hominoidea | Homininae | Hominoidea | Homininae |
| <b>301 nt</b>              | dG (kcal/mol) |           |           |            |            |           |            |          |           |            |           |            |           |
| <i>Homo sapiens</i>        |               | -84.50    |           | -88.10     | -76.50     | -71.50    | -66.70     | -77.00   | -82.20    | -84.00     | -79.20    | -80.80     | -80.30    |
| <i>Pan troglodytes</i>     |               | -82.90    |           | -88.10     | -76.10     | -71.40    | -70.50     | -76.20   | -84.40    | -81.00     | -81.30    | -80.80     | -80.30    |
| <i>Pan paniscus</i>        |               | -82.90    |           | -86.50     | -76.10     | -72.40    | -70.50     | -76.20   | -85.80    | -84.20     | -81.30    | -80.80     | -80.30    |
| <i>Gorilla gorilla</i>     |               | -82.40    |           | -86.20     | -76.10     | -72.40    | -68.00     | -76.90   | na        | na         | -85.40    | -80.80     | -80.30    |
| <i>Pongo abelii</i>        |               | -83.00    |           | -88.10     | -81.20     | -70.30    | -68.70     | -74.40   | -87.40    | -82.10     | -78.40    | -83.00     | -75.20    |
| <i>Nomascus leucogenys</i> |               | -80.30    |           | -87.90     | -76.60     | -70.30    | -67.70     | -74.30   | -90.10    | -82.10     | -83.10    | -80.80     | -80.30    |
| <i>Papio anubis</i>        |               | -82.40    |           | -88.00     | -78.70     | -68.70    | -68.30     | -76.00   | -86.30    | -84.80     | -84.90    | -82.50     | -79.40    |
| <i>Macaca fascicularis</i> |               | -81.70    |           | -88.00     | -75.00     | -68.40    | -66.80     | -76.30   | -86.20    | -83.50     | -85.50    | -79.60     | -78.60    |
| <i>Colobus angolensis</i>  |               | -84.50    |           | -88.00     | -75.40     | -69.80    | -71.70     | -76.20   | -86.20    | -83.20     | -85.60    | -82.20     | -80.30    |
| <b>151 nt</b>              |               |           |           |            |            |           |            |          |           |            |           |            |           |
| <i>Homo sapiens</i>        | -35.80        | -32.90    |           | -39.00     | -33.40     | -30.80    | -29.90     | -36.50   | -39.00    | -33.50     | -36.10    | -38.50     | -32.60    |
| <i>Pan troglodytes</i>     | -36.00        | -32.90    |           | -39.00     | -33.40     | -30.10    | -29.90     | -36.50   | -39.00    | -32.90     | -36.10    | -38.50     | -32.60    |
| <i>Pan paniscus</i>        | -36.00        | -32.90    |           | -39.00     | -33.40     | -30.10    | -29.90     | -36.50   | -39.00    | -32.90     | -36.10    | -38.50     | -32.60    |
| <i>Gorilla gorilla</i>     | -34.30        | -32.60    |           | -39.00     | -33.40     | -30.10    | -29.90     | -38.00   | na        | na         | -36.10    | -38.50     | -32.60    |
| <i>Pongo abelii</i>        | -35.20        | -32.60    |           | -39.00     | -33.40     | -29.40    | -30.40     | -38.00   | -41.40    | -32.90     | -40.10    | -38.50     | -32.00    |
| <i>Nomascus leucogenys</i> | -34.80        | -30.40    |           | -39.50     | -33.40     | -29.40    | -28.70     | -36.30   | -44.00    | -32.90     | -39.10    | -38.50     | -32.00    |
| <i>Papio anubis</i>        | -37.00        | -31.70    |           | -40.30     | -33.20     | -33.30    | -31.30     | -37.60   | -40.20    | -37.20     | -37.60    | -35.20     | -32.60    |
| <i>Macaca fascicularis</i> | -35.80        | -34.00    |           | -40.30     | -34.00     | -33.60    | -31.30     | -38.00   | -40.20    | -36.30     | -41.20    | -30.70     | -32.00    |
| <i>Colobus angolensis</i>  | -36.10        | -34.00    |           | -40.30     | -33.20     | -33.20    | -31.30     | -38.00   | -40.20    | -37.40     | -38.80    | -38.40     | -35.50    |
| <b>75 nt</b>               |               |           |           |            |            |           |            |          |           |            |           |            |           |
| <i>Homo sapiens</i>        | -17.60        | -11.90    | -11.80    | -12.90     | -11.30     | -14.90    | -13.70     | -16.40   | -16.80    | -10.80     | -19.40    | -14.90     | -14.10    |
| <i>Pan troglodytes</i>     | -17.00        | -11.90    | -11.80    | -12.90     | -11.30     | -14.90    | -13.70     | -16.40   | -16.80    | -11.50     | -21.20    | -14.90     | -14.10    |
| <i>Pan paniscus</i>        | -17.00        | -11.90    | -11.80    | -12.90     | -11.30     | -14.90    | -13.70     | -16.40   | -16.80    | -11.50     | -21.20    | -14.90     | -14.10    |
| <i>Gorilla gorilla</i>     | -17.60        | -10.40    | -11.10    | -12.90     | -11.30     | -14.90    | -13.70     | -15.20   | na        | -11.50     | -19.30    | -14.90     | -14.10    |
| <i>Pongo abelii</i>        | -14.90        | -9.80     | -13.00    | -12.90     | -10.90     | -13.80    | -13.70     | -15.20   | -19.70    | -11.50     | -24.10    | -14.90     | -14.10    |
| <i>Nomascus leucogenys</i> | -16.70        | -9.80     | -13.00    | -12.90     | -10.90     | -13.80    | -13.70     | -15.20   | -22.30    | -11.50     | -24.50    | -14.90     | -14.10    |
| <i>Papio anubis</i>        | -16.90        | -11.90    | -13.00    | -12.60     | -9.90      | -12.40    | -16.00     | -15.20   | -18.50    | -16.10     | -24.80    | -15.00     | -14.10    |
| <i>Macaca fascicularis</i> | -16.10        | -9.80     | -13.00    | -12.60     | -9.90      | -12.40    | -16.00     | -15.20   | -18.50    | -16.10     | -24.20    | -15.00     | -14.10    |
| <i>Colobus angolensis</i>  | -16.70        | -9.80     | -13.00    | -12.60     | -9.90      | -12.40    | -16.00     | -15.20   | -18.50    | -16.10     | -24.20    | -15.00     | -13.00    |
| <b>51 nt</b>               |               |           |           |            |            |           |            |          |           |            |           |            |           |
| <i>Homo sapiens</i>        | -6.60         | -9.10     | -9.20     | -10.00     | -7.00      | -8.80     | -6.00      | -10.80   | -11.20    | -9.20      | -13.10    | -6.70      | -10.50    |
| <i>Pan troglodytes</i>     | -5.70         | -9.10     | -9.20     | -10.00     | -7.00      | -8.80     | -6.00      | -10.80   | -11.20    | -9.20      | -13.10    | -6.70      | -10.50    |
| <i>Pan paniscus</i>        | -5.70         | -9.10     | -9.20     | -10.00     | -7.00      | -8.80     | -6.00      | -10.80   | -11.20    | -9.20      | -13.10    | -6.70      | -10.50    |
| <i>Gorilla gorilla</i>     | -6.60         | -7.60     | -7.70     | -10.00     | -7.00      | -8.80     | -6.00      | -10.70   | na        | -9.20      | -13.10    | -6.70      | -10.50    |
| <i>Pongo abelii</i>        | -5.70         | -7.00     | -8.30     | -10.00     | -6.60      | -9.50     | -6.00      | -10.70   | -14.40    | -9.20      | -15.60    | -6.70      | -9.80     |
| <i>Nomascus leucogenys</i> | -5.70         | -7.00     | -8.30     | -10.00     | -6.60      | -9.50     | -6.00      | -10.70   | -17.00    | -9.20      | -16.00    | -6.70      | -9.80     |
| <i>Papio anubis</i>        | -6.80         | -7.00     | -8.30     | -9.70      | -5.00      | -7.90     | -5.30      | -10.70   | -13.20    | -9.50      | -15.60    | -6.50      | -9.80     |
| <i>Macaca fascicularis</i> | -6.80         | -7.00     | -8.30     | -9.70      | -4.80      | -7.90     | -5.30      | -10.70   | -13.20    | -9.50      | -15.70    | -6.50      | -9.80     |
| <i>Colobus angolensis</i>  | -6.80         | -7.00     | -8.30     | -9.70      | -5.00      | -7.90     | -5.30      | -10.70   | -13.20    | -9.50      | -15.70    | -6.50      | -9.80     |
| <b>25 nt</b>               |               |           |           |            |            |           |            |          |           |            |           |            |           |
| <i>Homo sapiens</i>        | -0.60         | -0.30     | -3.00     | -2.40      | 0.20       | -2.10     | -0.30      | -2.80    | -3.30     | -5.90      | -6.70     | -3.00      | 0.60      |
| <i>Pan troglodytes</i>     | -0.60         | -0.30     | -3.00     | -2.40      | 0.20       | -2.10     | -0.30      | -2.80    | -3.30     | -5.90      | -6.70     | -3.00      | 0.60      |
| <i>Pan paniscus</i>        | -0.60         | -0.30     | -3.00     | -2.40      | 0.20       | -2.10     | -0.30      | -2.80    | -3.30     | -5.90      | -6.70     | -3.00      | 0.60      |
| <i>Gorilla gorilla</i>     | -0.60         | -0.30     | -2.50     | -2.40      | 0.20       | -2.10     | -0.30      | -0.60    | -3.30     | -5.90      | -6.70     | -3.00      | 0.60      |
| <i>Pongo abelii</i>        | -0.60         | -3.50     | -2.60     | -2.40      | -1.90      | -0.30     | -0.30      | -0.60    | -3.00     | -5.90      | -5.80     | -3.00      | 0.60      |
| <i>Nomascus leucogenys</i> | -0.60         | -3.50     | -2.60     | -2.40      | -1.90      | -0.30     | -0.30      | -0.60    | -3.00     | -5.90      | -5.90     | -3.00      | 0.60      |
| <i>Papio anubis</i>        | -0.60         | -3.50     | -2.60     | 2.40       | -1.90      | -0.30     | 0.40       | -0.60    | -3.00     | -4.10      | -5.80     | -3.10      | 0.60      |
| <i>Macaca fascicularis</i> | -0.60         | -3.50     | -2.60     | 2.40       | -1.90      | -0.30     | 0.40       | -0.60    | -3.00     | -4.10      | -1.10     | -3.10      | 0.60      |
| <i>Colobus angolensis</i>  | -0.60         | -3.50     | -2.60     | 2.40       | -1.90      | -0.30     | 0.40       | -0.60    | -3.00     | -4.10      | -1.10     | -3.10      | 0.60      |

**Table S8.** Gibbs free energy values for mRNA fragments of the *GRID2* gene and their change depending on nucleotide variants in different primate taxa, calculated by mFold [7]. Species from taxon were taken with minimal number of specific variants which are not in other species from this taxon.

| Nucleotide position in CDS  | 18                | 129               | 138 & 141        | 228                    | 457                    | 528               | 711                    | 879              | 1335              | 1593                   | 1860              | 2217                   | 2445              |
|-----------------------------|-------------------|-------------------|------------------|------------------------|------------------------|-------------------|------------------------|------------------|-------------------|------------------------|-------------------|------------------------|-------------------|
| Taxon with mutated allele   | <i>Homininae</i>  | <i>Homininae</i>  | <i>Hominini</i>  | <i>Hominoidea</i>      | <i>Hominoidea</i>      | <i>Homininae</i>  | <i>Hominoidea</i>      | <i>Hominini</i>  | <i>Homininae</i>  | <i>Hominoidea</i>      | <i>Homininae</i>  | <i>Hominoidea</i>      | <i>Homininae</i>  |
| Species from taxon          | <i>Gorilla</i>    | <i>Gorilla</i>    | <i>H.sap</i>     | <i>Pongo</i>           | <i>Nomascus</i>        | <i>Gorilla</i>    | <i>Gorilla</i>         | <i>H.sap</i>     | <i>P.trogl</i>    | <i>P.trogl</i>         | <i>P.trogl</i>    | <i>Nomascus</i>        | <i>Gorilla</i>    |
| dG (kcal/mol)               |                   |                   |                  |                        |                        |                   |                        |                  |                   |                        |                   |                        |                   |
| 301 nt                      | -82.40            | -82.40            | -84.50           | -88.10                 | -76.60                 | -72.40            | -68.00                 | -77.00           | -84.40            | -81.00                 | -81.30            | -80.80                 | -80.30            |
| 151 nt                      | -34.30            | -32.60            | -32.90           | -39.00                 | -33.40                 | -30.10            | -29.90                 | -36.50           | -39.00            | -32.90                 | -36.10            | -38.50                 | -32.60            |
| 75 nt                       | -17.60            | -10.40            | -11.80           | -12.90                 | -10.90                 | -14.90            | -13.70                 | -16.40           | -16.80            | -11.50                 | -21.20            | -14.90                 | -14.10            |
| 51 nt                       | -6.60             | -7.60             | -9.20            | -10.00                 | -6.60                  | -8.80             | -6.00                  | -10.80           | -11.20            | -9.20                  | -13.10            | -6.70                  | -10.50            |
| 25 nt                       | -0.60             | -0.30             | -3.00            | -2.40                  | -1.90                  | -2.10             | -0.30                  | -2.80            | -3.30             | -5.90                  | -6.70             | -3.00                  | 0.60              |
| Taxon with ancestral allele | <i>Hominoidea</i> | <i>Hominoidea</i> | <i>Homininae</i> | <i>Cercopithecidae</i> | <i>Cercopithecidae</i> | <i>Hominoidea</i> | <i>Cercopithecidae</i> | <i>Homininae</i> | <i>Hominoidea</i> | <i>Cercopithecidae</i> | <i>Hominoidea</i> | <i>Cercopithecidae</i> | <i>Hominoidea</i> |
| Species from taxon          | <i>Nomascus</i>   | <i>Nomascus</i>   | <i>Gorilla</i>   | <i>Colobus</i>         | <i>Colobus</i>         | <i>Nomascus</i>   | <i>Colobus</i>         | <i>Gorilla</i>   | <i>Pongo</i>      | <i>Maccaca fas</i>     | <i>Pongo</i>      | <i>Colobus</i>         | <i>Nomascus</i>   |
| dG (kcal/mol)               |                   |                   |                  |                        |                        |                   |                        |                  |                   |                        |                   |                        |                   |
| 301 nt                      | -80.30            | -80.30            | -82.40           | -88.00                 | -75.40                 | -70.30            | -71.70                 | -76.90           | -87.40            | -83.50                 | -78.40            | -82.20                 | -80.30            |
| 151 nt                      | -34.80            | -30.40            | -32.60           | -40.30                 | -33.20                 | -29.40            | -31.30                 | -38.00           | -41.40            | -36.30                 | -40.10            | -38.40                 | -32.00            |
| 75 nt                       | -16.70            | -9.80             | -11.10           | -9.70                  | -5.00                  | -13.80            | -16.00                 | -15.20           | -19.70            | -16.10                 | -24.10            | -6.50                  | -14.10            |
| 51 nt                       | -5.70             | -7.00             | -7.70            | -9.70                  | -5.00                  | -9.50             | -5.30                  | -10.70           | -14.40            | -9.50                  | -15.60            | -6.50                  | -9.80             |
| 25 nt                       | -0.60             | -3.50             | -2.50            | 2.40                   | -1.90                  | -0.30             | 0.40                   | -0.60            | -3.00             | -4.10                  | -5.80             | -3.10                  | 0.60              |
| ddG (kcal/mol)              |                   |                   |                  |                        |                        |                   |                        |                  |                   |                        |                   |                        |                   |
| Species comparison          | <i>Gg-Nl</i>      | <i>Gg-Nl</i>      | <i>Pt-Gg</i>     | <i>Pa-Ca</i>           | <i>Nl-Ca</i>           | <i>Gg-Nl</i>      | <i>Gg-Ca</i>           | <i>Pt-Gg</i>     | <i>Pt-Pa</i>      | <i>Pt-Mf</i>           | <i>Pt-Pa</i>      | <i>Nl-Ca</i>           | <i>Gg-Nl</i>      |
| 301 nt                      | -2.10             | -2.10             | -2.10            | -0.10                  | -1.20                  | -2.10             | 3.70                   | 0.70             | 3.00              | 1.10                   | -2.90             | 1.40                   | 0.00              |
| 151 nt                      | 0.50              | -2.20             | -0.30            | 1.30                   | -0.20                  | -0.70             | -1.20                  | 1.50             | 2.40              | 3.40                   | 4.00              | -0.10                  | -0.60             |
| 75 nt                       | -0.90             | -0.60             | -0.70            | -0.30                  | -1.00                  | -1.10             | 2.30                   | -1.20            | 2.90              | 4.60                   | 2.90              | 0.10                   | 0.00              |
| 51 nt                       | -0.90             | -0.60             | -1.50            | -0.30                  | -1.60                  | 0.70              | -0.70                  | -0.10            | 3.20              | 0.30                   | 2.50              | -0.20                  | -0.70             |
| 25 nt                       | 0.00              | 3.20              | -0.50            | -4.80                  | 0.00                   | -1.80             | -0.70                  | -2.20            | -0.30             | -1.80                  | -0.90             | 0.10                   | 0.00              |
| p value                     | 0.317             | 0.180             | 0.025            | 0.655                  | 0.046                  | 0.180             | 0.655                  | 0.180            | 0.180             | 0.180                  | 0.655             | 0.655                  | 0.157             |

*Gg* - *Gorilla gorilla*; *Nl* - *Nomascus leucogenys*; *Pt* - *Pan troglodytes*; *Pa* - *Pan paniscus*; *Ca* - *Colobus angolensis*; *Mf* - *Macaca fascicularis*.

**Table S9.** Comparison of the clinical characteristics of patients with different mutations in *GRID2* gene.

| Article                       | Mutation in <i>GRID2</i>                                              | Gait                                                                                                       | Speech                                                           | Cognition and memory                                                                                               | Ocular motor signs and visual                                                                                                                                       | Neurological signs and muscle tone                                                                                                                  | Other notes                                                                                                                                  |
|-------------------------------|-----------------------------------------------------------------------|------------------------------------------------------------------------------------------------------------|------------------------------------------------------------------|--------------------------------------------------------------------------------------------------------------------|---------------------------------------------------------------------------------------------------------------------------------------------------------------------|-----------------------------------------------------------------------------------------------------------------------------------------------------|----------------------------------------------------------------------------------------------------------------------------------------------|
| Maier et al. 2013 [8]         | Deletion of exon 1 (de novo)                                          | Bipedal; walk limited to 10 meters                                                                         | Dysarthria                                                       | Attention and anterograde memory deficits; information processing speed was significantly reduced                  | -                                                                                                                                                                   | Spastic paraplegia; increased tendon reflex and palmomental reflex; Babinski signs; dysmetria; dysphagia                                            | -                                                                                                                                            |
| Van Schil et al. 2014 [9]     | Deletion of exon 2 (homoz.)                                           | -                                                                                                          | Dysarthria                                                       | -                                                                                                                  | Oculomotor apraxia; difficulties in fixing gaze; nystagmus severe reduction in rod and cone responses                                                               | Abnormal backward head movements; truncal and appendicular ataxia; hypotonia; normal deep reflexes; slight ankle flexion and inversion contractures | Pectus excavatum deformity; some joint laxity                                                                                                |
| Veerapandian et al. 2017 [10] | Deletion of exon 2 (homoz.)                                           | Bipedal; ability to walk without support at 7 y.o.                                                         | Speech delay and limited vocabulary                              | Development delay; the degree of cognitive impairment is not specified                                             | Intermittent tonic upward gaze; vertical and horizontal nystagmus on eye movements; oculomotor apraxia (saccadic initiation failure and impaired voluntary pursuit) | Gross motor delays; severe central hypotonia; hyperreflexia; limb and truncal ataxia                                                                | Thoracolumbar kyphosis and scoliosis                                                                                                         |
| Utine et al. 2013 [11]        | Deletion of exons 3 and 4 (homoz.)                                    | Bipedal; but unable to walk independently at 8 y.o. and 11 y.o.                                            | Dysarthria                                                       | Global development delay; cognitive and memory impairment is not mentioned                                         | Nystagmus; oculomotor apraxia; inability to fix the gaze; unable to name colors                                                                                     | Abnormal backward head movements; truncal ataxia; dysmetria; dysidiadochokinesia; increased tendon reflex and bilateral Babinski reflex             | Pectus excavatum deformity; joint laxity; prominent calcaneus; subcutaneous fatty tissue increase bilaterally in the feet and prominent ears |
| Hill et al. 2013 [12]         | Deletion of exon 4 (heteroz.) and exon 2 (homoz.)                     | Bipedal; but walk only with support; wheelchair-dependent                                                  | Single words and short sentences                                 | Global development delay; speech and cognitive development                                                         | Nystagmus; a staring gaze; tonic upgaze                                                                                                                             | Truncal. appendicular ataxia; hypotonia                                                                                                             | Joint laxity; no dysmorphic facial features                                                                                                  |
| Coutelier et al. 2015 [13]    | Missense mutation (c.1966C.G/p. Leu656Val) (heteroz/homoz)            | Bipedal with instability signs (in 3 of 7 heteroz.); unable to walk independently at 7 and 5 y.o. (homoz.) | Limited; dysarthria (in 5 of heteroz. and homoz.)                | Cognitive impairment (in 3 of 7 heteroz carriers and homoz); attention difficulties; visual memory deficit; low IQ | Abnormal saccadic pursuit (in 5 of 7 heteroz and homoz); nystagmus (in 2 of 7 heteroz)                                                                              | Progressive cerebellar ataxia (slow progression in most carriers); hypotonia with brisk rotatinal reflex and pyramidal signs (in homoz)             | Asymptomatic (2 of 7 heteroz). hearing loss (in 3 of 7 heteroz)                                                                              |
|                               | 2 missense mutations (c.1960G>A/p. Ala654Thr. c.1961C>A/p. Ala654Asp) | Bipedal; ability to walk only with support at 3 and 7 y.o.                                                 | Able to speak in complete sentences; dysarthria                  | No impairment                                                                                                      | Abnormal saccadic pursuit; strabismus; nystagmus                                                                                                                    | Motor delay; progressive cerebellar ataxia; hypotonia                                                                                               | -                                                                                                                                            |
| Ali et al. 2017 [14]          | Missense mutation (c.2128C > T. p.Arg710Trp. homoz)                   | Bipedal; ability to walk without support at 7-8 y.o.                                                       | Dysarthria. limited vocabulary (≈100 words). often without logic | Development delay; Moderate intellectual disability                                                                | No signs; normal vision                                                                                                                                             | Slowly progressive cerebellar ataxia; increased peripheral muscle tone; ataxic gait; dysmetria; dysidiadochokinesia                                 | -                                                                                                                                            |
| Ceylan et al. 2020 [15]       | Duplication of exon 14 and possibly creating a premature stop codon   | Ability to walk with support at 5 y.o.                                                                     | Not mentioned                                                    | Mild intellectual disability                                                                                       | Ocular muscle weakness; nystagmus and oculomotor apraxia                                                                                                            | Truncal ataxia; head titubation; dysmetria; dysidiadochokinesia and wide-based gait; increased peripheral muscle tone                               | Thoracic kyphoscoliosis, distal hyperlaxity                                                                                                  |

|                               |                                                                                                |                                         |                                               |                                                                       |                                                                                 |                                                                                                                                                                                                                |                                                                                                                        |
|-------------------------------|------------------------------------------------------------------------------------------------|-----------------------------------------|-----------------------------------------------|-----------------------------------------------------------------------|---------------------------------------------------------------------------------|----------------------------------------------------------------------------------------------------------------------------------------------------------------------------------------------------------------|------------------------------------------------------------------------------------------------------------------------|
|                               | (p.Ile788*).<br>homoz.                                                                         |                                         |                                               |                                                                       |                                                                                 |                                                                                                                                                                                                                |                                                                                                                        |
| Iodice et al.<br>2020<br>[16] | Deletion of the exons.12 and 13; nonsense mutation (c.2564G > A, p.Ile788*). compound variants | Ability to walk with support at 18 m.o. | Slight language delay with dysarthria         | Not available                                                         | Nystagmus; with age: ocular flutter. oculomotor apraxia and bilateral exophoria | Motor delay; ataxia; action tremor; truncal oscillations; hypotonia; mild distal hypotrophy in lower limbs without pyramidal signs.                                                                            | -                                                                                                                      |
| Taghdiri et al. 2019<br>[17]  | Deletion of the exons 3 to 16 (homoz.)                                                         | Ability to walk with support at 6 y.o.  | Speech delay. Nasal and with stuttered speech | Developmental delay with the lowest amount of intellectual disability | Horizontal nystagmus                                                            | Truncal and appendicular ataxia; reduced force of extremities; slightly spastic muscle tone; increased deep tendon reflexes in lower extremities; signs of pyramidal involvement; impaired finger to nose test | Bilateral pes planus and hallux valgus                                                                                 |
| Hetzelt et al. 2020<br>[18]   | Nonsense mutation (c.568C > T, p.Gln190* homoz.)                                               | Not available                           | No speech, only syllables                     | Severe psychomotor development delay; very little interaction         | Nystagmus; tonic upgaze; oculomotor apraxia; incomplete loss of sight           | Severe and progressive truncal and appendicular ataxia; generalized muscular hypotonia; no head control; could not turn or sit, central hearing loss                                                           | Dystrophic; no facial dysmorphisms were noted                                                                          |
| Brazilian case                | Deletion of exons 5-7. (homoz.)                                                                | Quadrupedal                             | Speech is absent                              | Severe intellectual disability                                        | Strabismus                                                                      | Ataxia; seizures                                                                                                                                                                                               | Hirsutism; coarse facial features; short and small hands and feet; small stature; normal secondary sex characteristics |

Homoz. – homozygous genotype; heteroz. – heterozygous genotype.



## Supplemental Figures

| Genome position                | 93225840 | 94031933 | 94031993 | 94137900 | 94145790    | 94159584 | 94159638 | 94316763  | 94344032   | 94344060 | 94376878 | 94411797 | 94436426 | 94436547 | 94590593 |
|--------------------------------|----------|----------|----------|----------|-------------|----------|----------|-----------|------------|----------|----------|----------|----------|----------|----------|
| rs                             |          |          |          |          | rs373866971 |          |          | rs1385405 | rs72668716 |          |          |          |          |          |          |
| Nucleotide position in CDS     | 32       | 564      | 624      | 801      | 989         | 1188     | 1242     | 1251      | 1458       | 1488     | 1611     | 1866     | 2058     | 2178     | 2592     |
| Amino acid substitution        | S11F     |          |          |          | E330M       |          |          |           |            |          |          |          |          |          |          |
| Population                     |          |          |          |          |             |          |          | G>T       | T>C        |          |          |          |          |          |          |
| All                            |          |          |          |          | 0.00004     |          |          | 0.244     | 0.023      |          |          |          |          |          |          |
| MSL                            |          |          |          |          |             |          |          | 0.012     | 0.000      |          |          |          |          |          |          |
| ASW                            |          |          |          |          |             |          |          | 0.082     | 0.000      |          |          |          |          |          |          |
| CHB                            |          |          |          |          |             |          |          | 0.316     | 0.000      |          |          |          |          |          |          |
| GBR                            |          |          |          |          |             |          |          | 0.357     | 0.022      |          |          |          |          |          |          |
| PEL                            |          |          |          |          |             |          |          | 0.529     | 0.006      |          |          |          |          |          |          |
| STU                            |          |          |          |          |             |          |          | 0.201     | 0.078      |          |          |          |          |          |          |
| <i>Homo sapiens</i>            | C        | C        | T        | T        | C           | C        | A        | T         | C          | C        | G        | A        | G        | G        | A        |
| <i>Homo neanderthalensis</i>   | C        | C        | T        | T        | C           | C        | A        | T         | C          | C        | G        | A        | G        | G        | A        |
| <i>Denisova</i>                | C        | C        | T        | T        | Y           | C        | A        | G         | C          | C        | G        | A        | G        | G        | A        |
| <i>Pan troglodytes</i>         | T        | G        | C        | C        | C           | T        | C        | G         | Y          | T        | A        | G        | A        | A        | G        |
| <i>Pan paniscus</i>            | T        | G        | C        | C        | C           | T        | C        | G         | C          | T        | A        | G        | G        | A        | G        |
| <i>Macaca Nemestrina</i>       | C        | G        | C        | T        | C           | C        | C        | G         | T          | T        | A        | G        | A        | A        | A        |
| <i>Colobus Angolensis</i>      | C        | G        | C        | T        | C           | C        | C        | G         | T          | T        | A        | G        | A        | A        | A        |
| <i>Aotus nancymae</i>          | T        | G        | C        | T        | C           | C        | C        | G         | T          | T        | A        | G        | A        | A        | A        |
| <i>Mus musculus</i>            | C        | A        | C        | T        | C           | C        | T        | G         | T          | T        | A        | A        | A        | A        | A        |
| <i>Ochotona princeps</i>       | C        | G        | C        | T        | C           | C        | C        | G         | T          | C        | C        | G        | A        | A        | T        |
| <i>Canis lupus</i>             | C        | G        | C        | T        | C           | C        | C        | G         | T          | C        | A        | G        | A        | A        | A        |
| <i>Dasyurus novemcinctus</i>   | C        | G        | C        | T        | C           | T        | C        | A         | T          | T        | A        | G        | A        | A        | A        |
| <i>Echinops telfairi</i>       | C        | A        | C        | T        | C           | T        | A        | G         | T          | T        | A        | A        | A        | A        | A        |
| <i>Monodelphis domestica</i>   | T        | G        | C        | T        | C           | A        | T        | C         | T          | T        | A        | A        | A        | A        | A        |
| <i>Melopsittacus undulatus</i> | C        | A        | C        | T        | C           | G        | C        | C         | C          | T        | A        | G        | A        | T        | A        |
| <i>Struthio camelus</i>        | C        | G        | C        | T        | C           | T        | C        | C         | T          | T        | A        | A        | A        | C        | A        |
| <i>Chrysemys picta</i>         | C        | A        | C        | T        | C           | C        | C        | C         | T          | T        | A        | A        | A        | A        | A        |
| <i>Anolis carolinensis</i>     | C        | A        | C        | T        | C           | T        | C        | C         | T          | T        | G        | G        | A        | G        | T        |
| <i>Xenopus tropicalis</i>      | C        | C        | C        | T        | C           | A        | C        | C         | T          | T        | A        | G        | A        | A        | A        |
| <i>Coelacanth</i>              | C        | G        | C        | C        | G           | C        | C        | C         | T          | T        | T        | G        | A        | T        | T        |
| <i>Larimichthys crocea</i>     | C        | C        | C        | C        | C           | C        | T        | A         | T          | T        | C        | G        | A        | A        | C        |
| <i>Esox lucius</i>             | C        | G        | C        | T        | C           | A        | C        | C         | T          | T        | G        | A        | A        | G        | C        |
| <i>Danio rerio</i>             | T        | G        | C        | C        | C           | C        | C        | C         | T          | T        | C        | A        | C        | A        | A        |

**Figure S1.** Evolutionary analysis of nucleotide substitutions in CDS of *GRID2* gene in *Homo sapiens* and close relatives. In red — variants predicted by mFold tools to change levels of Gibbs free energy in mRNA ( $p < 0.05$ ). In black — variants predicted by mFold tools as “not affecting” level of Gibbs free energy in mRNA (Table S6).

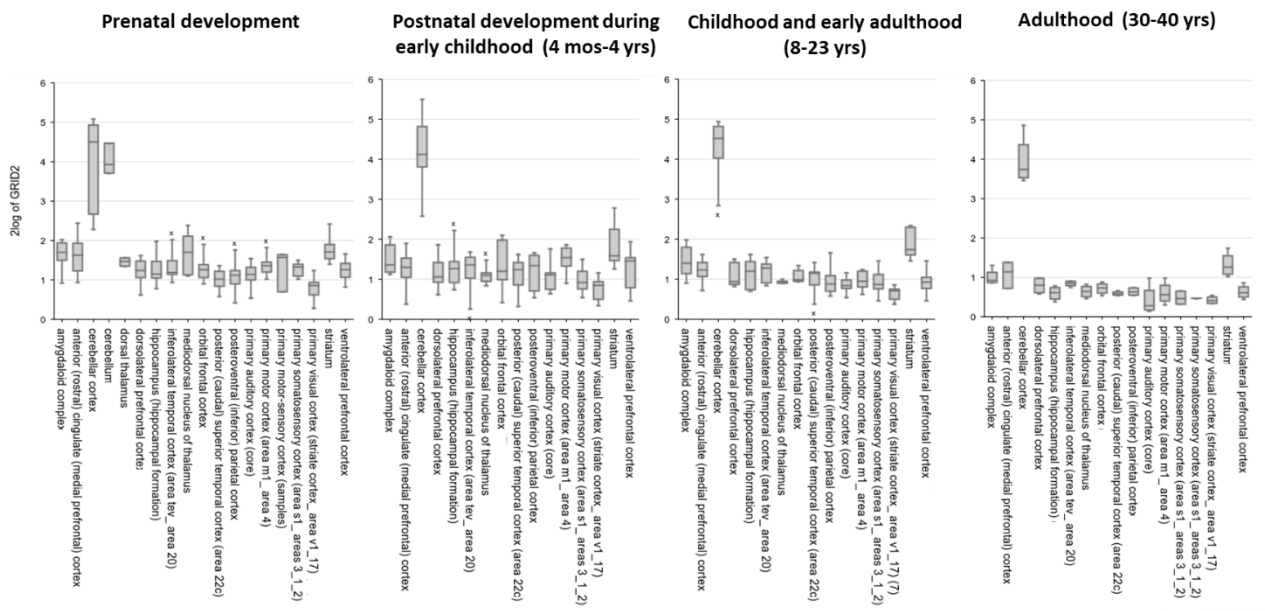

**Figure S2.** Expression of *GRID2* gene in different brain regions in *Homo sapiens* (BrainSpan [19]) visualized using R2: Genomics Analysis and Visualization Platform (<http://r2.amc.nl>).

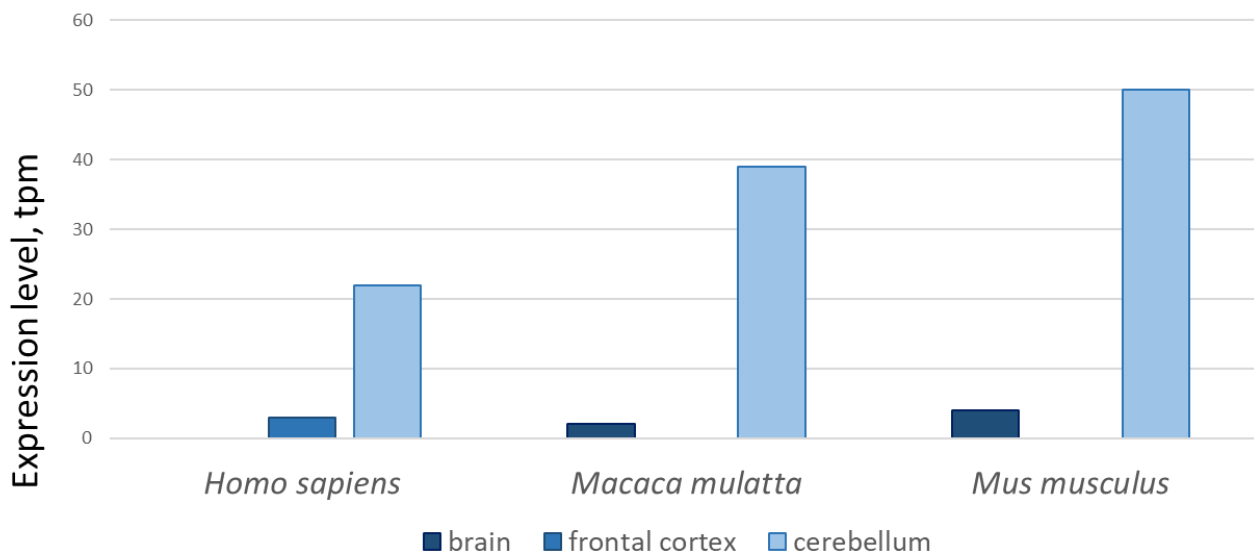

**Figure S3.** Expression of *GRID2* gene in the cerebellum in three mammalian species (obtained from Kaessmann lab mammalian gene expression data and Gene Expression atlas [20]).

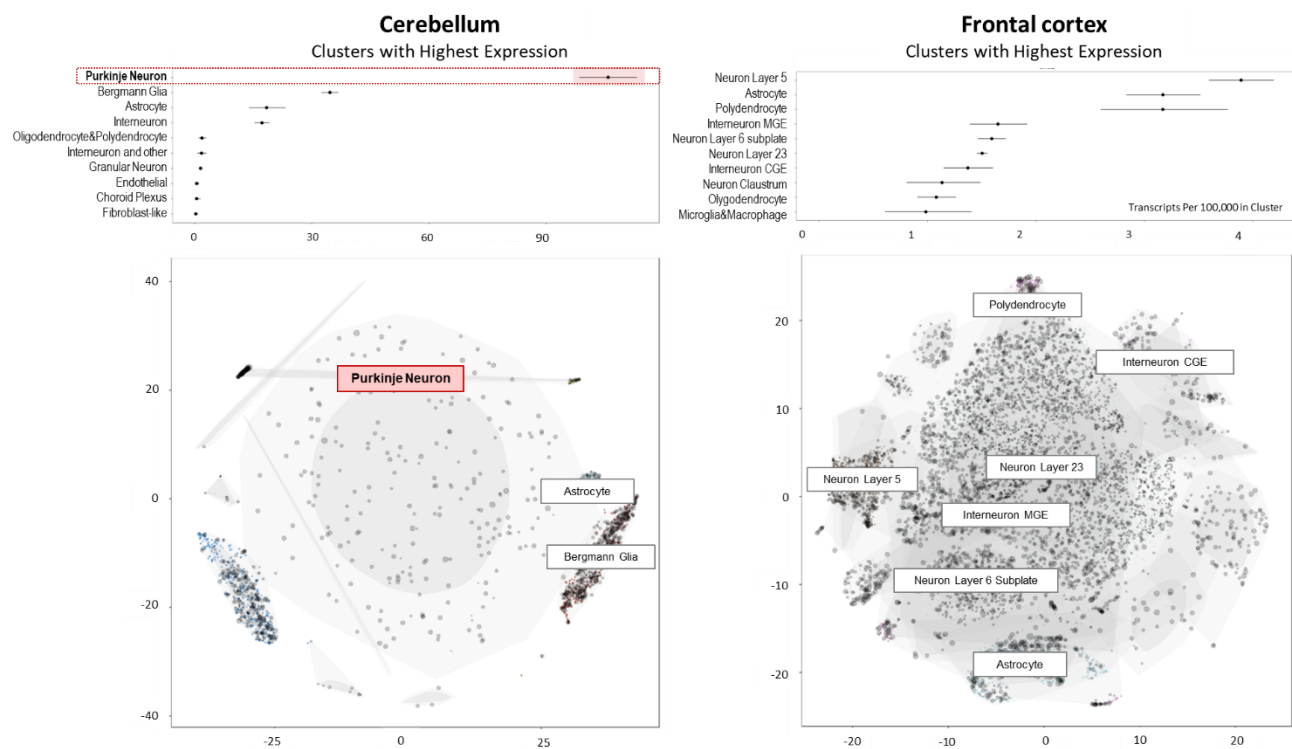

**Figure S4.** Single-cell expression of *GRID2* gene in the cerebellum and frontal cortex of adult mice (obtained from DropViz [21]).

## Supplemental References

1. Seelow, D.; Schuelke, M.; Hildebrandt, F.; Nürnberg, P. HomozygosityMapper--an interactive approach to homozygosity mapping. *Nucleic. Acids. Res.* **2009**, *37*, W593–W599.
2. 1000 Genomes Project Consortium; Abecasis, G.R.; Auton, A.; Brooks, L.D.; DePristo, M.A.; Durbin, R.M.; Handsaker, R.E.; Kang, H.M.; Marth, G.T.; McVean, G.A. An integrated map of genetic variation from 1,092 human genomes. *Nature* **2012**, *491*, 56–65.
3. Kircher, M.; Witten, D.M.; Jain, P.; O’Roak, B.J.; Cooper, G.M.; Shendure, J. A General Framework for Estimating the Relative Pathogenicity of Human Genetic Variants. *Nat. Genet.* **2014**, *46*, 310–315, doi:10.1038/ng.2892.
4. Yang, Z. PAML: A program package for phylogenetic analysis by maximum likelihood. *Comput. Appl. Biosci.* **1997**, *13*, 555–556.
5. Yang, Z. PAML 4: Phylogenetic analysis by maximum likelihood. *Mol. Biol. Evol.* **2007**, *24*, 1586–1591.
6. Yang, Z.; Nielsen, R. Mutation-selection models of codon substitution and their use to estimate selective strengths on codon usage. *Mol. Biol. Evol.* **2008**, *25*, 568–579.
7. Zuker, M. Mfold web server for nucleic acid folding and hybridization prediction. *Nucleic Acids Res.* **2003**, *31*, 3406–3415.
8. Maier, A.; Klopocki, E.; Horn, D.; Tzschach, A.; Holm, T.; Meyer, R.; Meyer, T. De novo partial deletion in GRID2 presenting with complicated spastic paraplegia. *Muscle Nerve* **2014**, *49*, 289–292.
9. Van Schil, K.; Meire, F.; Karlstetter, M.; Bauwens, M.; Verdin, H.; Coppieters, F.; Scheiffert, E.; Van Nechel, C.; Langmann, T.; Deconinck, N.; et al. Early onset autosomal recessive cerebellar ataxia associated with retinal dystrophy: New human hotfoot phenotype caused by homozygous GRID2 deletion. *Genet. Med.* **2015**, *17*, 291–299.
10. Veerapandian, A.; Enner, S.; Thulasi, V.; Ming, X. A Rare Syndrome of GRID2 Deletion in 2 Siblings. *Child Neurol. Open* **2017**, *4*, 2329048X17726168.
11. Utine, G.E.; Haliloğlu, G.; Salanci, B.; Çetinkaya, A.; Kiper, P.Ö.; Alanay, Y.; Aktas, D.; Boduroğlu, K.; Alikaşifoğlu, M. A homozygous deletion in GRID2 causes a human phenotype with cerebellar ataxia and atrophy. *J. Child Neurol.* **2013**, *28*, 926–932.
12. Hills, L.B.; Masri, A.; Konno, K.; Kakegawa, W.; Lam, A.-T.N.; Lim-Melia, E.; Chandy, N.; Hill, R.S.; Partlow, J.N.; Al-Saffar, M.; et al. Deletions in GRID2 lead to a recessive syndrome of cerebellar ataxia and tonic upgaze in humans. *Neurology* **2013**, *81*, 1378–1386.
13. Coutelier, M.; Burglen, L.; Mundwiller, E.; Abada-Bendib, M.; Rodriguez, D.; Chantot-Bastaraud, S.; Rougeot, C.; Cournelle, M.-A.; Milh, M.; Toutain, A.; et al. GRID2 mutations span from congenital to mild adult-onset cerebellar ataxia. *Neurology* **2015**, *84*, 1751–1759.
14. Ali, Z.; Zulfikar, S.; Klar, J.; Wikström, J.; Ullah, F.; Khan, A.; Abdullah, U.; Baig, S.; Dahl, N. Homozygous GRID2 missense mutation predicts a shift in the D-serine binding domain of GluD2 in a case with generalized brain atrophy and unusual clinical features. *BMC Med. Genet.* **2017**, *18*, 144.
15. Ceylan, A.C.; Acar Arslan, E.; Erdem, H.B.; Kavus, H.; Arslan, M.; Topaloğlu, H. Autosomal recessive spinocerebellar ataxia 18 caused by homozygous exon 14 duplication in GRID2 and review of the literature. *Acta Neurol. Belg.* **2020**, *121*, 1457–1462.
16. Iodice, A.; Spagnoli, C.; Cangini, M.; Soliani, L.; Rizzi, S.; Salerno, G.G.; Frattini, D.; Pisani, F.; Fusco, C. Long-term follow-up in infantile-onset SCAR18: A case report. *J. Clin. Neurosci.* **2020**, *77*, 232–234.
17. Taghdiri, M.; Kashef, A.; Abbassi, G.; Moshtagh, A.; Sadatian, N.; Fardaei, M.; Najafi, K.; Kariminejad, R. Further delineation of the phenotype caused by a novel large homozygous deletion of GRID2 gene in an adult patient. *Clin. Case Rep.* **2019**, *7*, 1149–1153.
18. Hetzelt, K.L.M.L.; Kraus, C.; Kusnik, S.; Thiel, C.T.; Uebe, S.; Ekici, A.B.; Trollmann, R.; Reis, A.; Zweier, C. A case of severe autosomal recessive spinocerebellar ataxia type 18 with a novel nonsense variant in GRID2. *Eur. J. Med. Genet.* **2020**, *63*, 103998.
19. Miller, J.A.; Ding, S.-L.; Sunkin, S.M.; Smith, K.A.; Ng, L.; Szafer, A.; Ebbert, A.; Riley, Z.L.; Royall, J.J.; Aiona, K.; et al. Transcriptional landscape of the prenatal human brain. *Nature* **2014**, *508*, 199–206.
20. Cardoso-Moreira, M.; Halbert, J.; Vallotton, D.; Velten, B.; Chen, C.; Shao, Y.; Liechti, A.; Ascensão, K.; Rummel, C.; Ovchinnikova, S.; et al. Gene Expression across Mammalian Organ Development. *Nature* **2019**, *571*, 505–509, doi:10.1038/s41586-019-1338-5.
21. Saunders, A.; Macosko, E.Z.; Wysoker, A.; Goldman, M.; Krienen, F.M.; de Rivera, H.; Bien, E.; Baum, M.; Bortolin, L.; Wang, S.; et al. Molecular Diversity and Specializations among the Cells of the Adult Mouse Brain. *Cell* **2018**, *174*, 1015-1030.e16.
